# Supplementary material for: Unraveling the clinicopathological features driving the emergence of ESR1 mutations in metastatic breast cancer
Source: PubMed Central journal article supplement (PMC6072793; doi:10.1038/s41523-018-0075-5), 2018-08-02

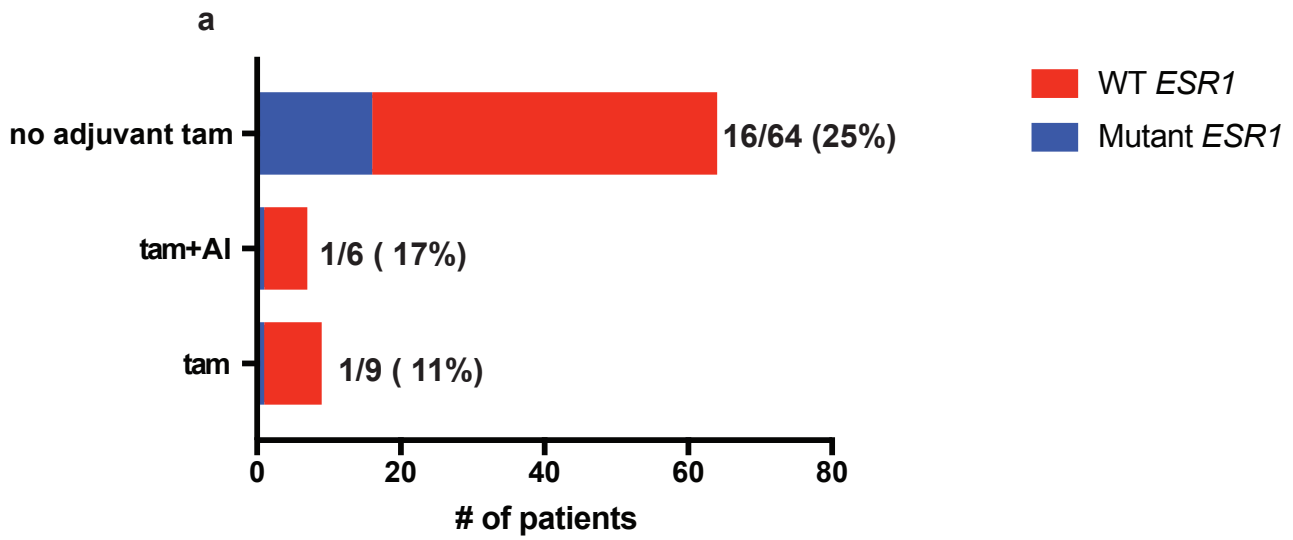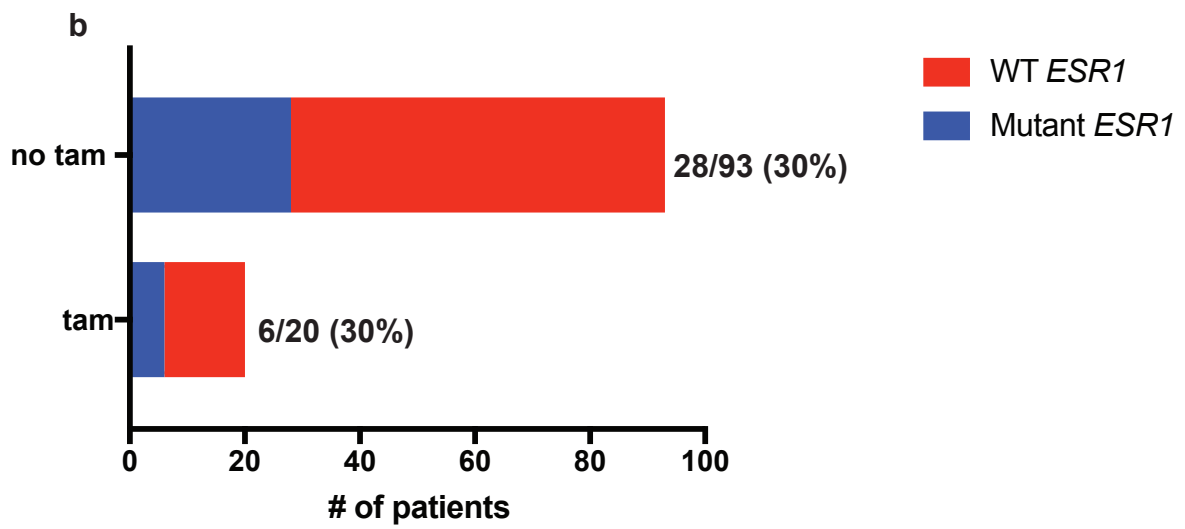

Supplement: 41523_2018_75_MOESM1_ESM.pdf [file 41523_2018_75_MOESM1_ESM.pdf]
